# Supplementary material for: Bioinformatics analysis suggests base modifications of tRNAs and miRNAs in Arabidopsis thaliana
Source: PubMed Central journal article supplement (PMC2674459; doi:10.1186/1471-2164-10-155), 2009-04-09
Supplement: 1471-2164-10-155-S2.pdf [file 1471-2164-10-155-S2.pdf]

**A. ath-MIR398c**

DR359082 TGGATCTCGACAGGGTTGATATGAGAACACACGAGCAATCAACGGCTATAACGACGCTAC  
DR359083 TGGATCTCGACAGGGTTGATATGAGAACACACGAGCAATCAACGGCTATAACGACGCTAC  
ath-MIR398c tggatctcgacagggttgatatgagaacacacgagcaatcaacggctataacgacgctac  
Substitution

DR359082 GTCATTGTTACAGCTCTCATTTTCATGTGTTCTCAGGTCACCCCTGCTGAGCTCTT  
DR359083 GTCATTGTTACAGCTCTCATTTCAAGTGTTCTCAGGTCACCCCTGCTGAGCTCTT  
ath-MIR398c gtcattgttacagctctcgtttcaTGTGTTCTCAGGTCACCCCTGctgagctctt  
Substitution \* \*

**B. ath-MIR835**

BX818094 TGCTCGATTCTTCAGAAAGAAATTCTGGTCATCTTTGTGTTTAGGCTTTTTCTTGCATGT  
EG450195 TGCTCGATTCTTCAGATAGAAATTCTGGTCATCTTTGTGTTTAGGCTTTTTCTTGCATAT  
EG476863 TGCTCGATTCTTCAGATAGAAATTCTGGTCATCTTTGTGTTTAGGCTTTTTCTTGCATAT  
EG476865 TGCTCGATTCTTCAGATAGAAATTCTGGTCATCTTTGTGTTTAGGCTTTTTCTTGCATAT  
EF183269 TGCTCGATTCTTCAGATAGAAATTCTGGTCATCTTTGTGTTTAGGCTTTTTCTTGCATAT  
ath-MIR835 tgctcgattcttcagatagaaattctggtcacatctttgtgtttaggcttttTCTTGCATAT  
Substitution \* \*

BX818094 GTTCTTTATCTCTATTGATTGATATTGTTCAATGAGCAACATACTTTTTCTTCTACCTG  
EG450195 GTTCTTTATCTCTATTGATTGATATTGTTCAATGAGCAACATACTTTTTTTTTTACCTG  
EG476863 GTTCTTTATCTCTATTGATTGATATTGTTCAATGAGCAACATACTTTTTCTTCTACCTG  
EG476865 GTTCTTTATCTCTATTGATTGATATTGTTCAATGAGCAACATACTTTTTCTTCTACCTG  
EF183269 GTTCTTTATCTCTATTGATTGATATTGTTCAATGAGCAACATACTTTTTCTTCTACCTG  
ath-MIR835 GTTCTTTATCtctattgattgatattgttcaatgagcaacatacttttctctctacctg  
Substitution \* \* \*

BX818094 GATTTGTTTGATGGTTTTAAGAACTCTGTTCTTTTTGACGTTTTACCCAACAATATAACT  
EG450195 GATTTGTTTGATGGTTTTAAGAACTCTGTTCTTTTTGACGTTTTACCCAACAATATAACT  
EG476863 GATTTGTTTGATGGTTTTAAGAACTCTGTTCTTTTTGACGTTTTACCCAACAATATAACT  
EG476865 GATTTGTTTGATGGTTTTAAGAACTCTGTTCTTTTTGACGTTTTACCCAACAATATAACT  
EF183269 GATTTGTTTGATGGTTTTAAGAACTCTGTTCTTTTTGACGTTTTACCCAACAATATAACT  
ath-MIR835 gatttgtttgatggTTTTAAGAACTCTGTTCTTTTTGACGTTTTACCCAACAATATAACT  
Substitution

BX818094 TCTGTTGTAGTCATCTTCTGCTGCAACCCATCCACAAAGCTTTTCATGCAAGATTAACC  
EG450195 TCTGTTGTAGTCATCTTTGCTGCAACCCATCCACAAAGCTTATCATGCAAGATTAACC  
EG476863 TCTGTTGTAGTCATCTTTGCTGCAACCCATCCACAAAGCTTATCATGCAAGATTAACC  
EG476865 TCTGTTGTAGTCATCTTCTGCTGCAACCCATCCACAAAGCTTATCATGCAAGATTAACC  
EF183269 TCTGTTGTAGTCATCTTCTGCTGCAACCCATCCACAAAGCTTATCATGCAAGATTAACC  
ath-MIR835 tctgttgtagtcacatcttctgctgcaacccatccacaaagcttattcatgcaagattaaacc  
Substitution \* \*

BX818094 CTTTCTCGATGGGTTGCAAGAGAACATAACTAAAATAGAAGTAACATTGTTGGGGAAAAA  
EG450195 CTTTCTCGATGGGTTGCAAGAGAACATCACTAAAATAGAAGTAACATTGTTGGGGAAAAA  
EG476863 CTTTCTCGATGGGTTGCAAGAGAACATCACTAAAATAGAAGTAACATTGTTGGGGAAAAA  
EG476865 CTTTCTCGATGGGTTGCAAGAGAACATCACTAAAATAGAAGTAACATTGTTGGGGAAAAA  
EF183269 CTTTCTCGATGGGTTGCAAGAGAACATCACTAAAATAGAAGTAACATTGTTGGGGAAAAA  
ath-MIR835 ctttctcgatgggTTGCAAGAGAACATCACTAAAATAGAAGTAACATTGTTGGGGAAAAA  
Substitution \*

|              |                                                              |
|--------------|--------------------------------------------------------------|
| BX818094     | CGTCACAAATCCAGGTGTTAGAGAATAGGATGCTGATCGTTGAAAATTACTATCTATAAA |
| EG450195     | CGTCACGAATCCAGGTATTAGAGAATAGGATGCTGATCGTTGAAAATAACTATCTATAAA |
| EG476863     | CGTCACGAATCCAGGTATTAGAGAATAGGATGCTGATCGTTGAAAATAACTATCTATAAA |
| EG476865     | CGTCACGAATCCAGGTATTAGAGAATAGGATGCTGATCGTTGAAAATAACTATCTATAAA |
| EF183269     | CGTCACGAATCCAGGTATTAGAGAATAGGATGCTGATCGTTGAAAATAACTATCTATAAA |
| ath-MIR835   | cgtcacaatccaggtattagagaataggatgctgatcgttgaaaataactatctataaa  |
| Substitution | * * *                                                        |

|              |                                          |
|--------------|------------------------------------------|
| BX818094     | GATGGAGAAGATACGCAAGAAAGAGTTGTATACACAAAGC |
| EG450195     | GATGGAGAAGATACGCAAGAAAGAGTTGTAAACACAAAGC |
| EG476863     | GATGGAGAAGATACGCAAGAAAGAGTTGTAAACACAAAGC |
| EG476865     | GATGGAGAAGATACGCAAGAAAGAGTTGTAAACACAAAGC |
| EF183269     | GATGGAGAAGATACGCAAGAAAGAGTTGTAAACACAAAGC |
| ath-MIR835   | gaTGGAGAAGATACGCAAGAAAGagttgtaaacacaaagc |
| Substitution | *                                        |

C. ath-MIR860

AV785609 #####CTTGGGGA-ATTCAAGATATATAGTCCAATCTATTGAAGTACTAGTACACCAGCTC  
BP647171 ATGTCTTGGTTAAATTCAATATATATAGTCCCATCTATTGAAGTACTAGTACACCAGCTC  
BP596532 ATGTCTTGGTTAAATTCAATATATATAGTCCCATCTATTGAAGTACTAGTACACCAGCTC  
AV439790 ATGTCTTGGTTAAATTCAATATATATAGTCCAATCTATTGAAGTACTAGTACGCCAGCTC  
BP638182 ATGTCTTGGTTAAATTCAATATATATAGTCCAATCTATTGAAGTACTAGTACACCACCTC  
AV542165 ATGTCTTGGTTAAATTCAATATATATAGTCCAATCTATTGAAGTACTAGTACACCAGCTC  
AV544231 ATGTCTTGGTTAAATTCAATATATATAGTCCAATCTATTGAAGTACTAGTACACCAGCTC  
ath-MIR860 atgtccttggttaaattcaatataatagtccttgaagtactagtacaccagctc  
Substitution \*\* \* \* \* \*

AV785609 TAATAAGCTGATGTGGGTAAGTAGTTCAATAGATT-GACTATGTATATTAATTTGACTA  
BP647171 TAATAAGCTGATGTGGGTAAGTAGTTCAATAGATTGGACTATGTATATTAATTTGACTA  
BP596532 TAATAAGCTGATGTGGGTAAGTAGTTCAATAGATTGGACTATGTATATTAATTTGACTA  
AV439790 TAATAAGCTGATGTGGGTAAGTAGTTCAATAGATTGGACTATGTATATTAAGTTGACTA  
BP638182 TAATAAGCTGATGTGGGTAAGTAGTTCAATAGATTGGACTATGTATATTAATTTGACTA  
AV542165 TAATAAGCTGATCTGGGTAAGTAGTTCACTAGATTGGACTATGTATATTAATTTGCCTA  
AV544231 TAATAAGCTGATGTGGGTAATAGTTCAATAGATTGGACTATGTATATTAATTTGACTA  
ath-MIR860 taataagctgatgtgggtaagtagtTCAATAGATTGGACTATGTATattaatTTGacta  
Substitution \* \* \* \* \*

AV785609 AGAGAT  
BP647171 AGAGAT  
BP596532 AGAGAT  
AV439790 AGAGAT  
BP638182 AGAGAT  
AV542165 AGAGCT  
AV544231 AGAGAT  
ath-MIR860 agagat  
Substitution \*
